# Supplementary material for: Evaluation of High-Resolution Mass Spectrometry for the Quantitative Analysis of Mycotoxins in Complex Feed Matrices
Source: MDPI journal article supplement (doi:10.3390/toxins11090531), 2019-09-12
Supplement: s1 [file s1]

# Supplementary Materials: Evaluation of High-Resolution Mass Spectrometry for the Quantitative Analysis of Mycotoxins in Complex Feed Matrices'

Tolke Jensen, Marthe de Boevre, Nils Preußke, Sarah de Saeger, Tim Birr, Joseph-Alexander Verreet and Frank D. Sönnichsen

**Table S1.** LC-HRMS parameters for the detection of *Fusarium* mycotoxins, including the retention time, analyte formula, molecular ion, precursor ion and product ions.

| Mycotoxin | Retention time (min) | Formula                                         | Molecular ion                     | Precursor ion (m/z) | Product ions (m/z) |
|-----------|----------------------|-------------------------------------------------|-----------------------------------|---------------------|--------------------|
| DON       | 5.51                 | C <sub>15</sub> H <sub>20</sub> O <sub>6</sub>  | [M+H] <sup>+</sup>                | 297.1333            | 203.1066, 231.1017 |
| DON3G     | 5.64                 | C <sub>21</sub> H <sub>30</sub> O <sub>11</sub> | [M+NH <sub>4</sub> ] <sup>+</sup> | 476.2126            | 249.1121, 279.1227 |
| DOM-1     | 6.51                 | C <sub>15</sub> H <sub>20</sub> O <sub>5</sub>  | [M+H] <sup>+</sup>                | 281.1384            | 109.0651, 215.1065 |
| VER*      | 6.93                 | C <sub>15</sub> H <sub>22</sub> O <sub>4</sub>  | [M+H] <sup>+</sup>                | 267.1591            | 219.1379, 213.1273 |
| 3-AcDON   | 7.38                 | C <sub>17</sub> H <sub>22</sub> O <sub>7</sub>  | [M+H] <sup>+</sup>                | 339.1144            | 321.1331, 189.0911 |
| 15-AcDON  | 7.38                 | C <sub>17</sub> H <sub>22</sub> O <sub>7</sub>  | [M+H] <sup>+</sup>                | 339.1144            | 137.0598, 189.0911 |
| β-ZEL     | 9.95                 | C <sub>18</sub> H <sub>24</sub> O <sub>5</sub>  | [M+H] <sup>+</sup>                | 321.1697            | 285.1484, 303.1592 |
| α-ZEL     | 10.45                | C <sub>18</sub> H <sub>24</sub> O <sub>5</sub>  | [M+H] <sup>+</sup>                | 321.1697            | 285.1484, 267.1381 |
| ZEN       | 10.60                | C <sub>18</sub> H <sub>22</sub> O <sub>5</sub>  | [M+H] <sup>+</sup>                | 319.1540            | 283.1330, 187.0755 |

\* used as internal standard; DON = deoxynivalenol; DON3G = deoxynivalenol-3-glucoside; DOM-1 = deepoxy-deoxynivalenol; 3-AcDON = 3-acetyl-deoxynivalenol; 15-AcDON = 15-acetyl-deoxynivalenol; β-ZEL = β-zearalenol; α-ZEL = α-zearalenol; ZEN = zearalenone

**Table S2.** Detection limits (µg/kg) of *Fusarium* mycotoxins in maize silage. Comparison of published LC-MS/MS methodologies and the proposed LC-HRMS method.

| Ref.            | Detector | Basis of calculation | Detection limit (µg/kg) |                |                |                |                |                |     |
|-----------------|----------|----------------------|-------------------------|----------------|----------------|----------------|----------------|----------------|-----|
|                 |          |                      | DON                     | DON3G          | DOM-1          | 3+15-AcDON     | β-ZEL          | α-ZEL          | ZEN |
| [1]             | LC-MS/MS | LOQ                  | 739                     | – <sup>a</sup> | 9   |
| [2]             | LC-MS/MS | LOQ                  | 99                      | – <sup>a</sup> | – <sup>a</sup> | – <sup>a</sup> | 64             | 64             | 23  |
| [3]             | LC-MS/MS | LOQ                  | 100                     | 50             | – <sup>a</sup> | 100            | 2.5            | 2.5            | 1   |
| [4]             | LC-MS/MS | CCβ                  | 1072                    | – <sup>a</sup> | – <sup>a</sup> | 1109           | 237            | 288            | 135 |
| Current article | LC-HRMS  | CCβ                  | 82                      | 94             | 31             | 20             | 90             | 125            | 61  |

<sup>a</sup> not included in study; LOQ = limit of quantification; CCβ = detection capability; DON = deoxynivalenol; DON3G = deoxynivalenol-3-glucoside; DOM-1 = deepoxy-deoxynivalenol; 3-AcDON = 3-acetyl-deoxynivalenol; 15-AcDON = 15-acetyl-deoxynivalenol; β-ZEL = β-zearalenol; α-ZEL = α-zearalenol; ZEN = zearalenone

**Table S3.** Concentrations ( $\mu\text{g}/\text{kg} \pm \text{U}$ ) of the detected mycotoxins in forage maize and maize silage samples collected in Northern Germany ( $n = 48$ ).

| No. | Sample type  | DON              | DON3G          | DOM-1 | 3+15-AcDON     | $\beta$ -ZEL | $\alpha$ -ZEL | ZEN            |
|-----|--------------|------------------|----------------|-------|----------------|--------------|---------------|----------------|
| 1   | forage maize | 2888 $\pm$ 578   | 651 $\pm$ 156  | n.d.  | 581 $\pm$ 93   | < CC $\beta$ | 30 $\pm$ 9    | 1638 $\pm$ 229 |
| 2   | forage maize | 2154 $\pm$ 323   | 473 $\pm$ 137  | n.d.  | 305 $\pm$ 40   | 135 $\pm$ 30 | < CC $\beta$  | 308 $\pm$ 43   |
| 3   | forage maize | 1027 $\pm$ 247   | 261 $\pm$ 94   | n.d.  | 168 $\pm$ 29   | < CC $\beta$ | < CC $\beta$  | 201 $\pm$ 40   |
| 4   | forage maize | 466 $\pm$ 70     | 119 $\pm$ 42   | n.d.  | 29 $\pm$ 4     | n.d.         | < CC $\beta$  | < CC $\beta$   |
| 5   | forage maize | 653 $\pm$ 131    | 121 $\pm$ 44   | n.d.  | 59 $\pm$ 8     | < CC $\beta$ | n.d.          | 66 $\pm$ 17    |
| 6   | forage maize | 1087 $\pm$ 261   | 184 $\pm$ 66   | n.d.  | 259 $\pm$ 34   | < CC $\beta$ | < CC $\beta$  | 462 $\pm$ 40   |
| 7   | forage maize | 2141 $\pm$ 321   | 449 $\pm$ 130  | n.d.  | 460 $\pm$ 74   | < CC $\beta$ | 28 $\pm$ 9    | 1414 $\pm$ 198 |
| 8   | forage maize | 3488 $\pm$ 384   | 1165 $\pm$ 280 | n.d.  | 602 $\pm$ 96   | < CC $\beta$ | < CC $\beta$  | 1236 $\pm$ 173 |
| 9   | forage maize | 2528 $\pm$ 379   | 694 $\pm$ 167  | n.d.  | 398 $\pm$ 88   | < CC $\beta$ | 90 $\pm$ 28   | 1644 $\pm$ 230 |
| 10  | forage maize | 794 $\pm$ 87     | 271 $\pm$ 98   | n.d.  | 91 $\pm$ 15    | n.d.         | < CC $\beta$  | 603 $\pm$ 151  |
| 11  | forage maize | 800 $\pm$ 88     | 198 $\pm$ 71   | n.d.  | 196 $\pm$ 26   | < CC $\beta$ | < CC $\beta$  | 638 $\pm$ 159  |
| 12  | forage maize | 1261 $\pm$ 302   | 342 $\pm$ 99   | n.d.  | 230 $\pm$ 30   | < CC $\beta$ | 41 $\pm$ 13   | 1299 $\pm$ 182 |
| 13  | forage maize | 10972 $\pm$ 1207 | 1167 $\pm$ 280 | n.d.  | 1799 $\pm$ 234 | 163 $\pm$ 36 | 423 $\pm$ 68  | 1569 $\pm$ 220 |
| 14  | forage maize | 1034 $\pm$ 248   | 149 $\pm$ 54   | n.d.  | 237 $\pm$ 31   | < CC $\beta$ | < CC $\beta$  | 391 $\pm$ 31   |
| 15  | forage maize | 4949 $\pm$ 544   | 917 $\pm$ 220  | n.d.  | 1144 $\pm$ 149 | n.d.         | 259 $\pm$ 80  | 810 $\pm$ 203  |
| 16  | forage maize | 3268 $\pm$ 654   | 841 $\pm$ 202  | n.d.  | 969 $\pm$ 126  | < CC $\beta$ | 83 $\pm$ 26   | 1334 $\pm$ 187 |
| 17  | forage maize | 1134 $\pm$ 272   | 293 $\pm$ 105  | n.d.  | 303 $\pm$ 39   | < CC $\beta$ | < CC $\beta$  | 265 $\pm$ 37   |
| 18  | forage maize | 5269 $\pm$ 580   | 894 $\pm$ 214  | n.d.  | 1173 $\pm$ 152 | < CC $\beta$ | 88 $\pm$ 28   | 1725 $\pm$ 242 |
| 19  | forage maize | 1668 $\pm$ 334   | 584 $\pm$ 169  | n.d.  | 781 $\pm$ 133  | n.d.         | 35 $\pm$ 8    | 937 $\pm$ 187  |
| 20  | forage maize | 3382 $\pm$ 676   | 1044 $\pm$ 251 | n.d.  | 1165 $\pm$ 151 | < CC $\beta$ | 83 $\pm$ 26   | 1351 $\pm$ 189 |
| 21  | forage maize | 7704 $\pm$ 847   | 1240 $\pm$ 298 | n.d.  | 1832 $\pm$ 238 | < CC $\beta$ | 56 $\pm$ 17   | 925 $\pm$ 185  |
| 22  | maize silage | 4035 $\pm$ 404   | n.d.           | n.d.  | 30 $\pm$ 4     | < CC $\beta$ | < CC $\beta$  | 1123 $\pm$ 157 |
| 23  | maize silage | 1893 $\pm$ 379   | < CC $\beta$   | n.d.  | 30 $\pm$ 4     | < CC $\beta$ | 187 $\pm$ 77  | 446 $\pm$ 45   |
| 24  | maize silage | 2764 $\pm$ 359   | n.d.           | n.d.  | 24 $\pm$ 3     | n.d.         | 186 $\pm$ 76  | 564 $\pm$ 102  |
| 25  | maize silage | 1312 $\pm$ 341   | n.d.           | n.d.  | < CC $\beta$   | < CC $\beta$ | n.d.          | 63 $\pm$ 11    |
| 26  | maize silage | 595 $\pm$ 77     | n.d.           | n.d.  | < CC $\beta$   | < CC $\beta$ | < CC $\beta$  | 392 $\pm$ 39   |
| 27  | maize silage | 1021 $\pm$ 265   | < CC $\beta$   | n.d.  | < CC $\beta$   | < CC $\beta$ | n.d.          | 75 $\pm$ 14    |
| 28  | maize silage | 1130 $\pm$ 294   | < CC $\beta$   | n.d.  | 31 $\pm$ 4     | < CC $\beta$ | < CC $\beta$  | 147 $\pm$ 31   |
| 29  | maize silage | 2705 $\pm$ 541   | n.d.           | n.d.  | 39 $\pm$ 5     | < CC $\beta$ | < CC $\beta$  | 267 $\pm$ 59   |
| 30  | maize silage | 2737 $\pm$ 547   | n.d.           | n.d.  | < CC $\beta$   | < CC $\beta$ | < CC $\beta$  | 1375 $\pm$ 303 |
| 31  | maize silage | < CC $\beta$     | n.d.           | n.d.  | < CC $\beta$   | < CC $\beta$ | < CC $\beta$  | < CC $\beta$   |
| 32  | maize silage | 407 $\pm$ 81     | n.d.           | n.d.  | 33 $\pm$ 4     | < CC $\beta$ | < CC $\beta$  | 417 $\pm$ 42   |
| 33  | maize silage | 312 $\pm$ 56     | n.d.           | n.d.  | < CC $\beta$   | < CC $\beta$ | < CC $\beta$  | 111 $\pm$ 20   |
| 34  | maize silage | 2093 $\pm$ 419   | n.d.           | n.d.  | < CC $\beta$   | < CC $\beta$ | < CC $\beta$  | 555 $\pm$ 100  |
| 35  | maize silage | 2306 $\pm$ 461   | < CC $\beta$   | n.d.  | 149 $\pm$ 21   | < CC $\beta$ | 199 $\pm$ 82  | 667 $\pm$ 140  |
| 36  | maize silage | 2111 $\pm$ 422   | n.d.           | n.d.  | < CC $\beta$   | < CC $\beta$ | < CC $\beta$  | 537 $\pm$ 97   |
| 37  | maize silage | 2156 $\pm$ 431   | < CC $\beta$   | n.d.  | 33 $\pm$ 4     | < CC $\beta$ | 181 $\pm$ 74  | 893 $\pm$ 125  |
| 38  | maize silage | 5401 $\pm$ 540   | < CC $\beta$   | n.d.  | 45 $\pm$ 6     | n.d.         | 275 $\pm$ 113 | 956 $\pm$ 134  |
| 39  | maize silage | 4675 $\pm$ 468   | n.d.           | n.d.  | 32 $\pm$ 4     | < CC $\beta$ | 339 $\pm$ 125 | 1596 $\pm$ 351 |
| 40  | maize silage | 2356 $\pm$ 306   | n.d.           | n.d.  | 21 $\pm$ 3     | n.d.         | < CC $\beta$  | 426 $\pm$ 43   |
| 41  | maize silage | 694 $\pm$ 90     | n.d.           | n.d.  | < CC $\beta$   | < CC $\beta$ | < CC $\beta$  | 184 $\pm$ 26   |
| 42  | maize silage | 5129 $\pm$ 513   | n.d.           | n.d.  | < CC $\beta$   | < CC $\beta$ | 178 $\pm$ 73  | 852 $\pm$ 179  |
| 43  | maize silage | 1044 $\pm$ 271   | n.d.           | n.d.  | 82 $\pm$ 14    | < CC $\beta$ | < CC $\beta$  | 77 $\pm$ 14    |
| 44  | maize silage | 409 $\pm$ 82     | n.d.           | n.d.  | < CC $\beta$   | < CC $\beta$ | < CC $\beta$  | 67 $\pm$ 12    |
| 45  | maize silage | 3177 $\pm$ 413   | n.d.           | n.d.  | < CC $\beta$   | < CC $\beta$ | n.d.          | 704 $\pm$ 148  |
| 46  | maize silage | 2247 $\pm$ 449   | n.d.           | n.d.  | 103 $\pm$ 12   | n.d.         | < CC $\beta$  | 408 $\pm$ 41   |
| 47  | maize silage | 349 $\pm$ 63     | n.d.           | n.d.  | < CC $\beta$   | < CC $\beta$ | < CC $\beta$  | 271 $\pm$ 60   |
| 48  | maize silage | 265 $\pm$ 48     | n.d.           | n.d.  | < CC $\beta$   | < CC $\beta$ | < CC $\beta$  | 519 $\pm$ 93   |

n.d.= not detected; CC $\beta$ = detection capability; DON = deoxynivalenol; DON3G = deoxynivalenol-3-glucoside; DOM-1 = deepoxy-deoxynivalenol; 3-AcDON = 3-acetyl-deoxynivalenol; 15-AcDON = 15-acetyl-deoxynivalenol;  $\beta$ -ZEL =  $\beta$ -zearealenol;  $\alpha$ -ZEL =  $\alpha$ -zearealenol; ZEN = zearealenone

1. Rasmussen, R.R.; Storm, I.M.L.D.; Rasmussen, P.H.; Smedsgaard, J.; Nielsen, K.F. Multi-mycotoxin analysis of maize silage by LC-MS/MS. *Anal. Bioanal. Chem.* **2010**, *397*, 765–776.
2. Van Pamel, E.; Verbeken, A.; Vlaemynck, G.; de Boever, J.; Daeseleire, E. Ultrahigh-performance liquid chromatographic-tandem mass spectrometric multimycotoxin method for quantitating 26 mycotoxins in maize silage. *J. Agric. Food Chem.* **2011**, *59*, 9747–9755.

3. Dzuman, Z.; Zachariasova, M.; Lacina, O.; Veprikova, Z.; Slavikova, P.; Hajslova, J. A rugged high-throughput analytical approach for the determination and quantification of multiple mycotoxins in complex feed matrices. *Talanta* **2014**, *121*, 263–272.
4. Dagnac, T.; Latorre, A.; Fernández Lorenzo, B.; Llompart, M. Validation and application of a liquid chromatography-tandem mass spectrometry based method for the assessment of the co-occurrence of mycotoxins in maize silages from dairy farms in NW Spain. *Food Addit. Contam. Part A* **2016**, *33*, 1850–1863.
